# Supplementary material for: Interactive Effects of Methionine and Lead Intake on Cognitive Function among Chinese Adults
Source: MDPI journal article supplement (doi:10.3390/nu14214561), 2022-10-29
Supplement: s1 [file s1]

**Supplemental Table S1.** Sample characteristics of Chinese adults aged ≥55 years old attending the first cognitive function test by quartiles of cumulative methionine intake (n = 4661).

| <b>(a) animal</b>                           |                |                |                |                |         |
|---------------------------------------------|----------------|----------------|----------------|----------------|---------|
|                                             | Q1<br>N=1166   | Q2<br>N=1165   | Q3<br>N=1165   | Q4<br>N=1165   | p-value |
| Age (years)                                 | 63.9 (8.2)     | 63.4 (7.6)     | 63.6 (8.1)     | 62.8 (7.1)     | 0.008   |
| Sex                                         |                |                |                |                | <0.001  |
| Men                                         | 512 (43.9%)    | 502 (43.1%)    | 550 (47.2%)    | 673 (57.8%)    |         |
| Women                                       | 654 (56.1%)    | 663 (56.9%)    | 615 (52.8%)    | 492 (42.2%)    |         |
| Income                                      |                |                |                |                | <0.001  |
| Low                                         | 636 (55.1%)    | 379 (32.7%)    | 242 (21.0%)    | 206 (18.0%)    |         |
| Medium                                      | 324 (28.1%)    | 440 (38.0%)    | 372 (32.3%)    | 260 (22.7%)    |         |
| High                                        | 195 (16.9%)    | 340 (29.3%)    | 536 (46.6%)    | 681 (59.4%)    |         |
| Education                                   |                |                |                |                | <0.001  |
| Low                                         | 955 (89.8%)    | 832 (79.2%)    | 714 (68.9%)    | 547 (51.8%)    |         |
| Medium                                      | 79 (7.4%)      | 134 (12.7%)    | 185 (17.8%)    | 225 (21.3%)    |         |
| High                                        | 29 (2.7%)      | 85 (8.1%)      | 138 (13.3%)    | 285 (27.0%)    |         |
| Urbanization                                |                |                |                |                | <0.001  |
| Low                                         | 657 (56.3%)    | 294 (25.2%)    | 158 (13.6%)    | 74 (6.4%)      |         |
| Medium                                      | 336 (28.8%)    | 424 (36.4%)    | 324 (27.8%)    | 214 (18.4%)    |         |
| High                                        | 173 (14.8%)    | 447 (38.4%)    | 683 (58.6%)    | 877 (75.3%)    |         |
| Smoking                                     |                |                |                |                | 0.50    |
| Non smoker                                  | 769 (66.2%)    | 796 (68.4%)    | 789 (68.0%)    | 778 (66.8%)    |         |
| Ex-smokers                                  | 48 (4.1%)      | 39 (3.4%)      | 33 (2.8%)      | 50 (4.3%)      |         |
| Current smokers                             | 344 (29.6%)    | 328 (28.2%)    | 339 (29.2%)    | 337 (28.9%)    |         |
| SURVEY YEAR                                 |                |                |                |                | <0.001  |
| 1997                                        | 594 (50.9%)    | 515 (44.2%)    | 487 (41.8%)    | 456 (39.1%)    |         |
| 2000                                        | 189 (16.2%)    | 192 (16.5%)    | 217 (18.6%)    | 199 (17.1%)    |         |
| 2004                                        | 266 (22.8%)    | 288 (24.7%)    | 264 (22.7%)    | 288 (24.7%)    |         |
| 2006                                        | 117 (10.0%)    | 170 (14.6%)    | 197 (16.9%)    | 222 (19.1%)    |         |
| Alcohol drinking                            | 324 (28.5%)    | 344 (30.1%)    | 355 (31.0%)    | 409 (35.7%)    | 0.002   |
| Physical activity (MET)                     | 112.8 (115.7)  | 94.3 (103.7)   | 74.1 (87.6)    | 69.2 (79.4)    | <0.001  |
| BMI (kg/m <sup>2</sup> )                    | 22.1 (3.5)     | 23.0 (3.7)     | 23.4 (3.6)     | 23.7 (3.4)     | <0.001  |
| BMI>24 (kg/m <sup>2</sup> )                 | 276 (26.3%)    | 388 (36.1%)    | 444 (40.5%)    | 499 (45.0%)    | <0.001  |
| Energy intake (kcal/d)                      | 2027.0 (655.4) | 1986.8 (613.9) | 2078.0 (584.0) | 2281.4 (619.1) | <0.001  |
| Fat intake (g/d)                            | 45.3 (27.5)    | 59.0 (31.5)    | 73.1 (34.0)    | 89.4 (37.7)    | <0.001  |
| Protein intake (g/d)                        | 55.3 (21.4)    | 57.4 (19.2)    | 63.6 (20.2)    | 78.1 (24.0)    | <0.001  |
| Carbohydrate intake (g/d)                   | 347.2 (123.3)  | 301.8 (101.7)  | 283.6 (91.9)   | 281.3 (91.3)   | <0.001  |
| Cumulative methionine intake (mg/d)         | 1123.7 (333.0) | 1179.2 (257.4) | 1375.5 (227.3) | 1817.4 (382.9) | <0.001  |
| Cumulative animal methionine intake (mg/d)  | 78.2 (59.2)    | 303.3 (71.0)   | 570.1 (82.4)   | 1034.7 (329.0) | <0.001  |
| Cumulative plant methionine intake (mg/d)   | 1045.4 (335.7) | 875.9 (250.8)  | 805.5 (218.7)  | 782.7 (204.9)  | <0.001  |
| Most recent methionine intake(mg/d)         | 1042.8 (385.0) | 1159.5 (388.9) | 1365.8 (394.9) | 1835.6 (668.2) | <0.001  |
| Most recent animal methionine intake (mg/d) | 95.7 (121.2)   | 356.6 (230.1)  | 617.1 (277.5)  | 1085.2 (611.5) | <0.001  |
| Most recent plant methionine intake (mg/d)  | 947.0 (370.0)  | 802.8 (291.6)  | 748.7 (262.1)  | 750.3 (247.4)  | <0.001  |
| Lead intake (ug/d)                          | 102.7 (37.1)   | 96.8 (34.5)    | 97.8 (31.1)    | 109.5 (32.4)   | <0.001  |
| Intake of fruit (g/d)                       | 8.1 (60.5)     | 19.3 (81.6)    | 25.7 (74.4)    | 39.8 (95.0)    | <0.001  |
| Intake of fresh vegetable (g/d)             | 274.4 (184.2)  | 262.0 (179.8)  | 268.5 (169.7)  | 295.0 (171.7)  | <0.001  |
| Intake of meat (g/d)                        | 12.1 (24.5)    | 49.8 (48.7)    | 90.4 (64.2)    | 144.7 (101.8)  | <0.001  |
| Hypertension                                | 356 (33.3%)    | 390 (35.4%)    | 395 (35.4%)    | 425 (37.7%)    | 0.19    |
| Diabetes                                    | 25 (2.2%)      | 34 (3.0%)      | 38 (3.3%)      | 52 (4.6%)      | 0.013   |
| Stroke                                      | 21 (1.8%)      | 25 (2.2%)      | 26 (2.3%)      | 28 (2.4%)      | 0.78    |
| Self-reported poor memory                   | 335 (29.0%)    | 249 (21.6%)    | 214 (18.6%)    | 166 (14.3%)    | <0.001  |

| Self-reported memory decline                 | 546 (48.6%)    | 456 (40.1%)    | 420 (37.2%)    | 357 (31.4%)    | <0.001  |
|----------------------------------------------|----------------|----------------|----------------|----------------|---------|
| Global cognition score                       | 11.2 (6.9)     | 12.8 (6.7)     | 13.7 (6.4)     | 15.2 (6.3)     | <0.001  |
| Global cognition score < 7                   | 329 (28.2%)    | 235 (20.2%)    | 163 (14.0%)    | 110 (9.4%)     | <0.001  |
| <b>(b) plant</b>                             |                |                |                |                |         |
|                                              | Q1<br>N=1166   | Q2<br>N=1165   | Q3<br>N=1165   | Q4<br>N=1165   | p-value |
| Age (years)                                  | 67.3 (8.8)     | 63.7 (7.6)     | 61.7 (6.7)     | 61.0 (6.1)     | <0.001  |
| Sex                                          |                |                |                |                | <0.001  |
| Men                                          | 364 (31.2%)    | 524 (45.0%)    | 630 (54.1%)    | 719 (61.7%)    |         |
| Women                                        | 802 (68.8%)    | 641 (55.0%)    | 535 (45.9%)    | 446 (38.3%)    |         |
| Income                                       |                |                |                |                | <0.001  |
| Low                                          | 289 (25.1%)    | 307 (26.9%)    | 356 (30.7%)    | 511 (44.1%)    |         |
| Medium                                       | 323 (28.1%)    | 343 (30.0%)    | 365 (31.5%)    | 365 (31.5%)    |         |
| High                                         | 539 (46.8%)    | 492 (43.1%)    | 439 (37.8%)    | 282 (24.4%)    |         |
| Education                                    |                |                |                |                | <0.001  |
| Low                                          | 650 (68.7%)    | 731 (69.0%)    | 779 (71.1%)    | 888 (80.3%)    |         |
| Medium                                       | 137 (14.5%)    | 155 (14.6%)    | 176 (16.1%)    | 155 (14.0%)    |         |
| High                                         | 159 (16.8%)    | 174 (16.4%)    | 141 (12.9%)    | 63 (5.7%)      |         |
| Urbanization                                 |                |                |                |                | <0.001  |
| Low                                          | 135 (11.6%)    | 167 (14.3%)    | 313 (26.9%)    | 568 (48.8%)    |         |
| Medium                                       | 216 (18.5%)    | 319 (27.4%)    | 392 (33.6%)    | 371 (31.8%)    |         |
| High                                         | 815 (69.9%)    | 679 (58.3%)    | 460 (39.5%)    | 226 (19.4%)    |         |
| Smoking                                      |                |                |                |                | <0.001  |
| Non smoker                                   | 907 (78.1%)    | 819 (70.4%)    | 752 (64.6%)    | 654 (56.3%)    |         |
| Ex-smokers                                   | 38 (3.3%)      | 33 (2.8%)      | 50 (4.3%)      | 49 (4.2%)      |         |
| Current smokers                              | 216 (18.6%)    | 311 (26.7%)    | 362 (31.1%)    | 459 (39.5%)    |         |
| SURVEY YEAR                                  |                |                |                |                | 0.030   |
| 1997                                         | 535 (45.9%)    | 536 (46.0%)    | 494 (42.4%)    | 487 (41.8%)    |         |
| 2000                                         | 223 (19.1%)    | 195 (16.7%)    | 188 (16.1%)    | 191 (16.4%)    |         |
| 2004                                         | 245 (21.0%)    | 262 (22.5%)    | 294 (25.2%)    | 305 (26.2%)    |         |
| 2006                                         | 163 (14.0%)    | 172 (14.8%)    | 189 (16.2%)    | 182 (15.6%)    |         |
| Alcohol drinking                             | 269 (23.6%)    | 316 (27.6%)    | 412 (35.9%)    | 435 (38.2%)    | <0.001  |
| Physical activity (MET)                      | 51.3 (62.7)    | 70.7 (86.6)    | 100.5 (104.0)  | 126.9 (116.8)  | <0.001  |
| BMI (kg/m2)                                  | 23.1 (3.7)     | 23.4 (3.8)     | 23.1 (3.6)     | 22.6 (3.3)     | <0.001  |
| BMI>24 (kg/m2)                               | 415 (38.3%)    | 461 (42.0%)    | 411 (37.8%)    | 320 (30.1%)    | <0.001  |
| Energy intake (kcal/d)                       | 1714.0 (478.2) | 2001.7 (520.6) | 2206.8 (576.3) | 2450.9 (676.1) | <0.001  |
| Fat intake (g/d)                             | 66.6 (34.9)    | 69.3 (36.3)    | 70.3 (38.3)    | 60.5 (36.6)    | <0.001  |
| Protein intake (g/d)                         | 53.8 (19.0)    | 61.6 (20.5)    | 66.8 (23.0)    | 72.2 (25.2)    | <0.001  |
| Carbohydrate intake (g/d)                    | 219.9 (55.6)   | 276.5 (69.1)   | 319.9 (82.3)   | 397.7 (116.8)  | <0.001  |
| Cumulative methionine intake (mg/d)          | 1192.6 (448.9) | 1349.0 (373.5) | 1418.8 (376.7) | 1535.5 (358.3) | <0.001  |
| Cumulative animal methionine intake (mg/d)   | 618.6 (431.3)  | 578.3 (373.4)  | 494.5 (377.9)  | 294.5 (317.2)  | <0.001  |
| Cumulative plant methionine intake (mg/d)    | 573.9 (101.3)  | 770.8 (41.6)   | 924.2 (52.3)   | 1241.0 (234.5) | <0.001  |
| Most recent methionine intake(mg /d)         | 1197.0 (636.4) | 1332.5 (484.2) | 1411.9 (558.5) | 1462.1 (526.6) | <0.001  |
| Most recent animal methionine intake (mg /d) | 649.8 (612.0)  | 617.6 (453.7)  | 554.6 (503.2)  | 332.3 (397.6)  | <0.001  |
| Most recent plant methionine intake (mg/d)   | 547.3 (131.0)  | 714.9 (147.2)  | 857.3 (190.5)  | 1129.7 (346.7) | <0.001  |
| Lead intake (ug/d)                           | 79.8 (25.0)    | 95.2 (24.9)    | 107.8 (29.0)   | 124.2 (39.2)   | <0.001  |
| Intake of fruit (g/d)                        | 28.2 (71.4)    | 23.4 (75.9)    | 23.0 (78.5)    | 18.4 (91.3)    | 0.031   |
| Intake of fresh vegetable (g/d)              | 216.5 (128.4)  | 261.6 (151.1)  | 298.0 (166.4)  | 323.8 (227.2)  | <0.001  |
| Intake of meat (g/d)                         | 89.6 (81.2)    | 87.3 (81.0)    | 78.7 (91.9)    | 41.5 (63.5)    | <0.001  |
| Hypertension                                 | 456 (41.0%)    | 390 (34.9%)    | 401 (36.3%)    | 319 (29.5%)    | <0.001  |
| Diabetes                                     | 47 (4.1%)      | 52 (4.6%)      | 22 (1.9%)      | 28 (2.5%)      | <0.001  |
| Stroke                                       | 39 (3.4%)      | 22 (1.9%)      | 19 (1.7%)      | 20 (1.8%)      | 0.012   |
| Self-reported poor memory                    | 271 (23.5%)    | 229 (19.8%)    | 238 (20.6%)    | 226 (19.7%)    | 0.085   |

|                              |             |             |             |             |        |
|------------------------------|-------------|-------------|-------------|-------------|--------|
| Self-reported memory decline | 503 (44.4%) | 424 (37.4%) | 421 (37.0%) | 431 (38.4%) | <0.001 |
| Global cognition score       | 12.7 (6.9)  | 13.7 (6.5)  | 13.9 (6.6)  | 12.6 (6.8)  | <0.001 |
| Global cognition score < 7   | 248 (21.3%) | 174 (14.9%) | 168 (14.4%) | 247 (21.2%) | <0.001 |

**Supplement Table S2** Association between quartiles of methionine intake and cognition among Chinese adults.

|                                 | Quartiles of intake |                         |                         |                         | P trend |
|---------------------------------|---------------------|-------------------------|-------------------------|-------------------------|---------|
|                                 | Q1                  | Q2                      | Q3                      | Q4                      |         |
| <i><b>Total methionine</b></i>  |                     |                         |                         |                         |         |
| Global cognition score <7       | 1.00                | 0.99 (0.79-1.23)        | 1.07 (0.84-1.35)        | <b>0.71 (0.53-0.95)</b> | 0.100   |
| Self-reported poor memory       | 1.00                | 0.94 (0.78-1.14)        | 0.86 (0.70-1.05)        | <b>0.72 (0.57-0.92)</b> | 0.007   |
| Self-reported memory decline    | 1.00                | 0.97 (0.82-1.16)        | 0.85 (0.71-1.03)        | <b>0.69 (0.56-0.85)</b> | <0.001  |
| <i><b>Animal methionine</b></i> |                     |                         |                         |                         |         |
| Global cognition score <7       | 1.00                | <b>0.73 (0.59-0.91)</b> | <b>0.55 (0.43-0.71)</b> | <b>0.37 (0.27-0.50)</b> | <0.001  |
| Self-reported poor memory       | 1.00                | 0.83 (0.68-1.01)        | <b>0.72 (0.58-0.89)</b> | <b>0.60 (0.47-0.77)</b> | <0.001  |
| Self-reported memory decline    | 1.00                | 0.86 (0.72-1.03)        | <b>0.76 (0.63-0.92)</b> | <b>0.65 (0.52-0.80)</b> | <0.001  |
| <i><b>Plant methionine</b></i>  |                     |                         |                         |                         |         |
| Global cognition score <7       | 1.00                | <b>1.30 (1.02-1.66)</b> | <b>1.51 (1.16-1.97)</b> | <b>2.23 (1.63-3.03)</b> | <0.001  |
| Self-reported poor memory       | 1.00                | <b>1.31 (1.07-1.60)</b> | 1.23 (0.99-1.54)        | <b>1.38 (1.06-1.78)</b> | 0.041   |
| Self-reported memory decline    | 1.00                | <b>1.19 (1.00-1.41)</b> | <b>1.21 (1.00-1.46)</b> | 1.15 (0.92-1.43)        | 0.244   |

Values are odds ratio (95%CI) from mixed effect logistic regression.

Models adjusted for age, gender and energy intake, education, income, urbanization, smoking, alcohol drinking, and physical activity, intake of fruit and vegetable, BMI, hypertension, self-reported diabetes, and stroke.

All participants attended at least two waves of survey.
